# Supplementary material
Source: publisher site journal article supplement (https://www.dovepress.com/article/258365)
Supplement: Supplementary file 1 [file get_supplementary_file.php]

Supplementary table 1: Next generation sequencing (NGS) assay of 118 commonly mutated genes in hematological disorders

| *ABL1* | *ASXL1* | *ATM* | *ATRX* | *BCL11B* | *BCL9* | *BCOR* | *BCORL1* | *BIRC3* | *BRAF* | *CALR* |
| --- | --- | --- | --- | --- | --- | --- | --- | --- | --- | --- |
| *CARD11* | *CBL* | *CBLB* | *CCND3* | *CD33* | *CDKN2A* | *CEBPA* | *CNOT3* | *CREBBP* | *CRLF2* | *CSF1R* |
| *CSF3R* | *CUX1* | *CXCR4* | *DDX41* | *DKC1* | *DLEU2* | *DNMT3A* | *DNMT3B* | *EGFR* | *ELANE* | *EP300* |
| *ERG* | *ETV6* | *EZH2* | *FANCA* | *FBXW7* | *FLT3* | *GATA1* | *GATA2* | *GNAS* | *GNB1* | *HLA-A* |
| *ID3* | *IDH1* | *IDH2* | *IKZF1* | *IL7R* | *IRF4* | *JAK1* | *JAK2* | *JAK3* | *KDM6A* | *KIT* |
| *KLF2* | *KRAS* | *MAP2K1* | *MAX* | *MEF2B* | *MLL* | *MPL* | *MYC* | *MYD88* | *NOTCH1* | *NOTCH2* |
| *NOTCH3* | *NPM1* | *NRAS* | *NT5C2* | *PAX5* | *PDGFRA* | *PHF6* | *PIK3CA* | *PIM1* | *PRPF40B* | *PTEN* |
| *PTPN11* | *RAD21* | *RBPJ* | *RET* | *RPL10* | *RPL11* | *RPL24* | *RPL35A* | *RPL5* | *RPS14* | *RPS19* |
| *RPS26* | *RUNX1* | *SETBP1* | *SETD2* | *SF1* | *SF3B1* | *SH2B3* | *SMC1A* | *SMC3* | *SRSF2* | *SRSF6* |
| *STAG2* | *STAT3* | *TERC* | *TERT* | *TET2* | *TINF2* | *TLE1* | *TLR2* | *TMEM14B* | *TNFAIP3* | *TP53* |
| *TRAF3* | *U2AF1* | *UTRN* | *WAS* | *WHSC1* | *WT1* | *XPO* | *ZRSR2* |  |  |  |

Supplementary table 2: RT-PCR assay covering 56 commonly detected fusion genes in leukemia

| *AML1-ETO* | *PML-RaRa(V)* | *FIP1L1-RARα* | *AML1-MDS1/EVI1* | *STRNE6-PDGFRA* | *KMT2A-AF1q* |
| --- | --- | --- | --- | --- | --- |
| *BCR-ABL（210）* | *NPM-RARα* | *TEL-AML1* | *AML1-MTG16* | *BCR-PDGFRA* | *KMT2A-AF4* |
| *BCR-ABL（190）* | *NUMA1-RARα* | *E2A-PBX1* | *ETV6-PDGFRA* | *TEL-PDGFRB* | *KMT2A-AF6* |
| *BCR-ABL（230）* | *PLZF-RARα* | *E2A-HLF* | *FIP1L1-PDGFRA* | *KMT2A-AF10* | *KMT2A-AF9* |
| *PML-RaRa（L）* | *PRKAR1A-RARα* | *SIL-TAL1* | *KIF5BE-PDGFRA* | *KMT2A-AF17* | *KMT2A-AFX* |
| *PML-RaRa(S)* | *STAT5b-RARα* | *DEK-CAN* | *CDK5RAP2-PDGFRA* | *KMT2A-AF1p* | *KMT2A-ELL* |
| *NUP98-HoxA13* | *NUP98-HoxA9* | *NUP98-HoxC11* | *NUP98-HoxD13* | *NUP98-PMX1* | *KMT2A-ENL* |
| *TEL-ABL* | *TEL-JAK2* | *TLS-ERG* | *NUP98-HoxA11* | *SET-CAN* | *KMT2A-SEPT6* |
| *WT1* | *HOX11* | *HOX11L2* | *CALM-AF10* | *HLXB9-ETV6* | *KMT2A-AF5* |
| *NPM-ALK* | *NPM-MLF1* |  |  |  |  |
